# Supplementary material for: Exome Sequencing in an Admixed Isolated Population Indicates NFXL1 Variants Confer a Risk for Specific Language Impairment
Source: PubMed Central journal article supplement (PMC4363375; doi:10.1371/journal.pgen.1004925), 2015-03-17
Supplement: pgen.1004925.s001.pdf [file pgen.1004925.s001.pdf]

Figure S1 – A flow diagram showing the filtering of the exome data.

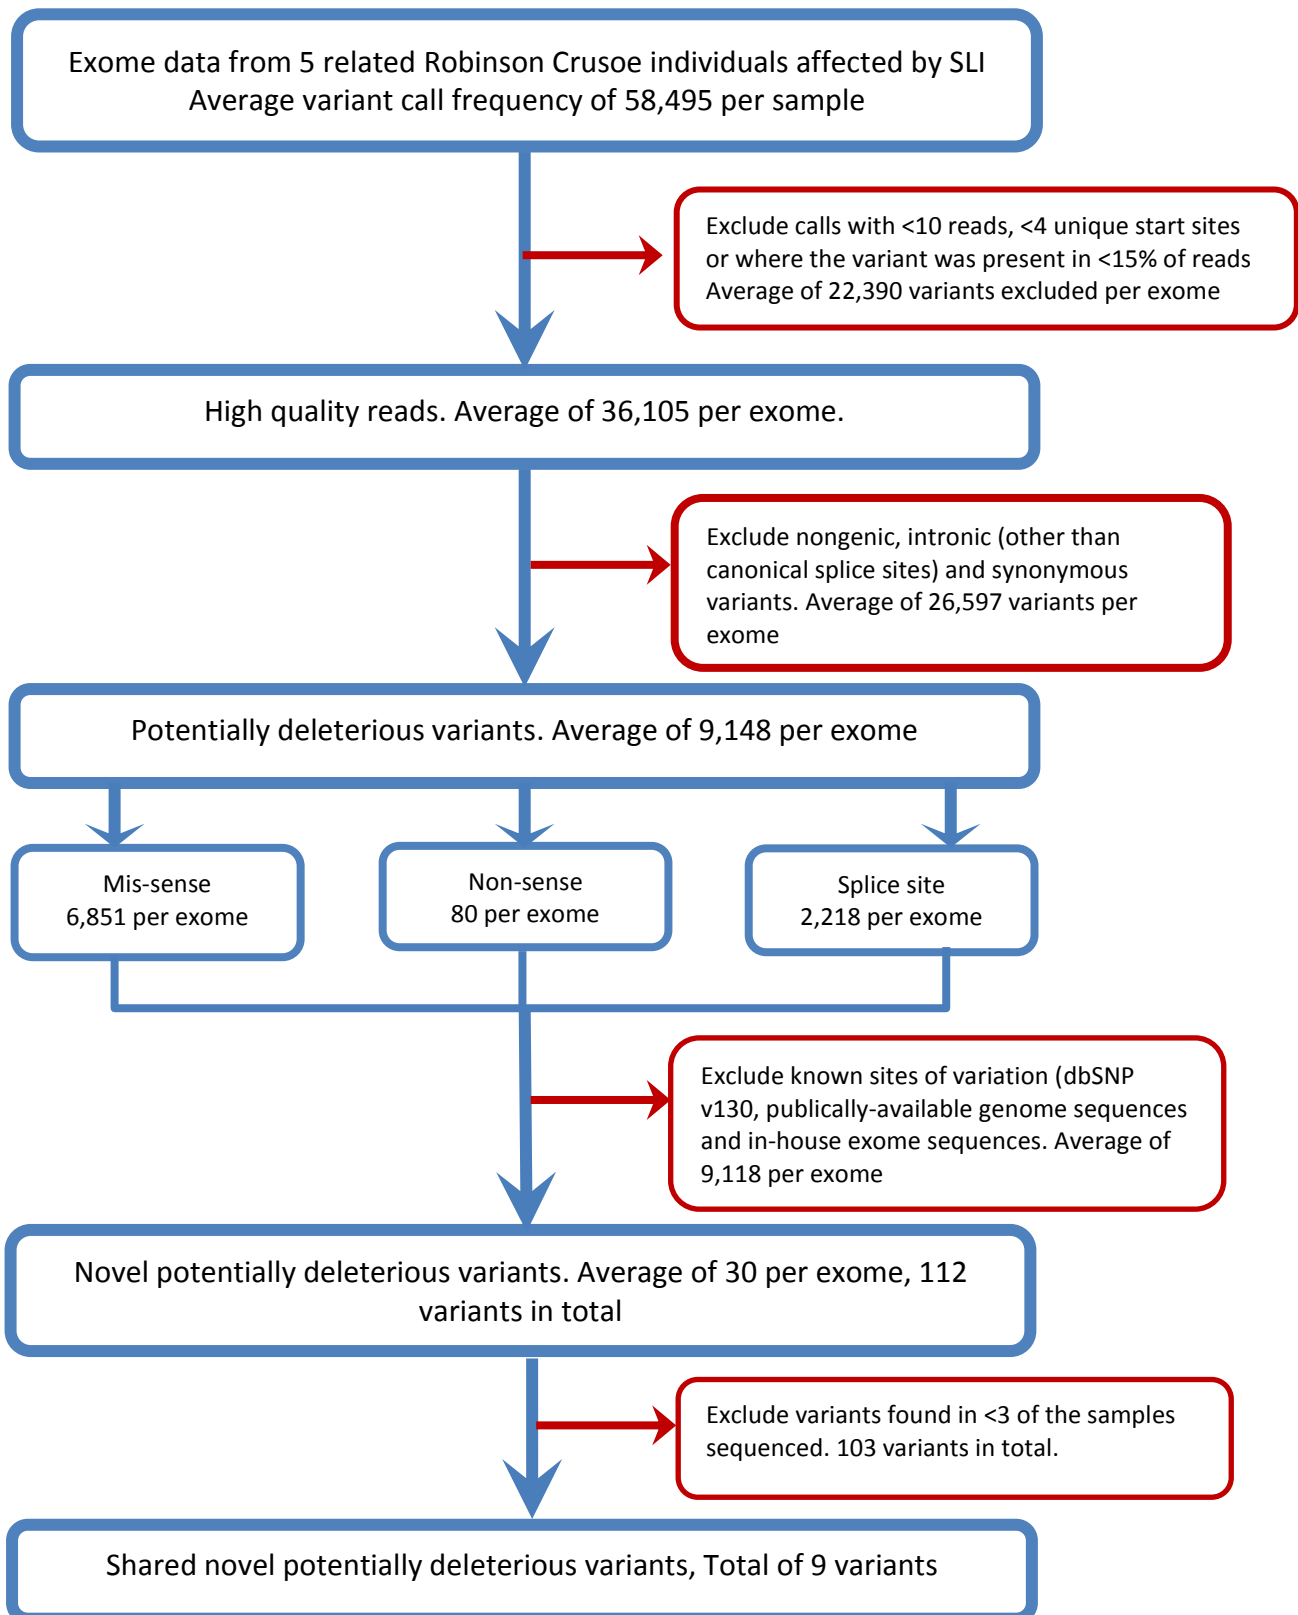

Blue boxes show each filter step and red boxes describe exclusion criteria involved in each step
