# Supplementary material for: Exome Sequencing in an Admixed Isolated Population Indicates NFXL1 Variants Confer a Risk for Specific Language Impairment
Source: PubMed Central journal article supplement (PMC4363375; doi:10.1371/journal.pgen.1004925), 2015-03-17
Supplement: pgen.1004925.s002.pdf [file pgen.1004925.s002.pdf]

Figure S2 - Structure of pedigrees used for linkage analyses (redrawn using data from [35]).

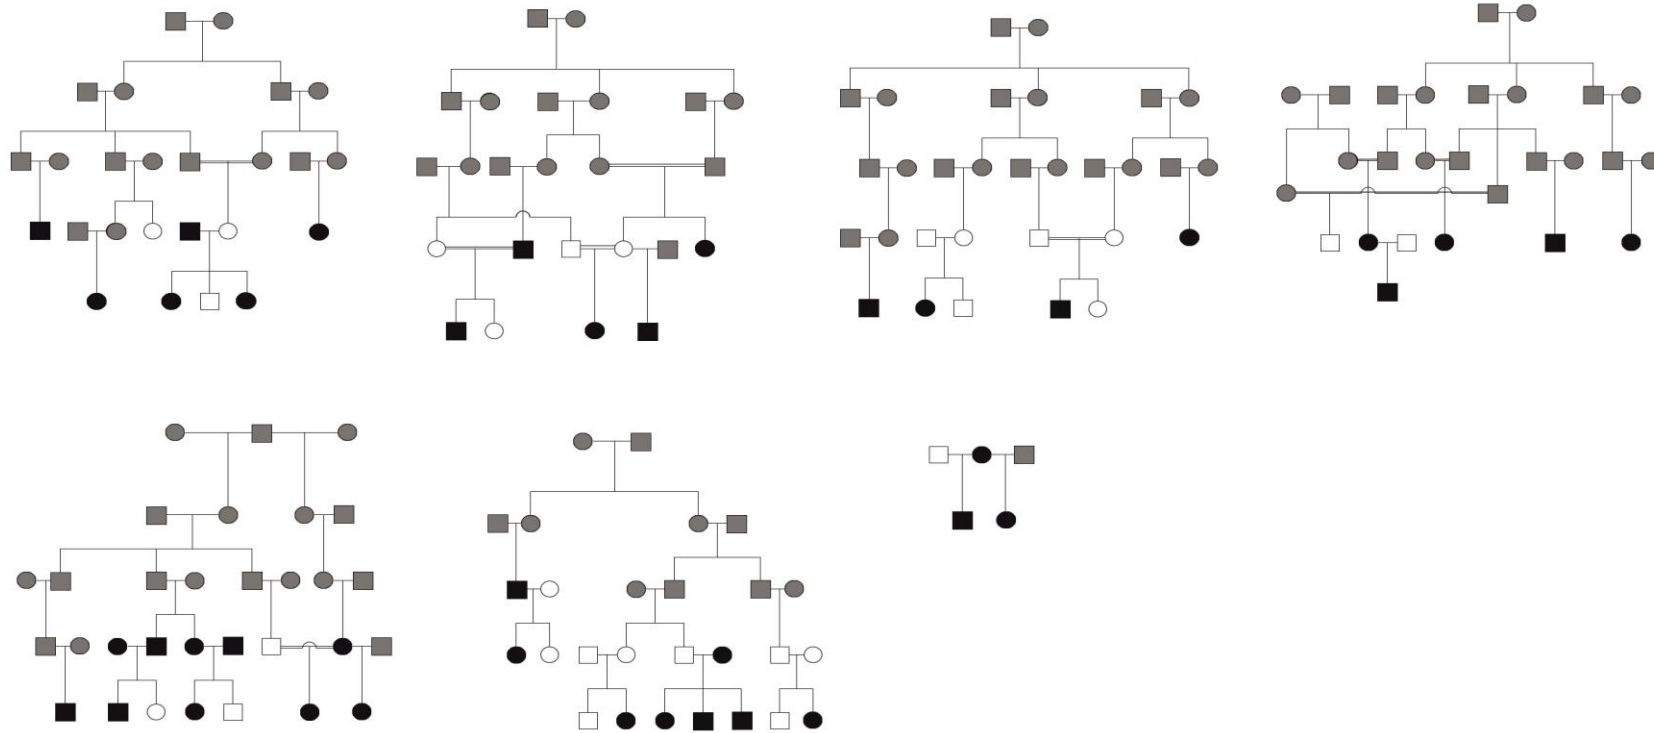

Seven pedigrees of no more than 24-bits were used for linkage analyses.

Individuals with language impairment are colored in black. Individuals with typical language are denoted in white. Individuals with unknown phenotype are shaded grey.
