# Supplementary material for: Exome Sequencing in an Admixed Isolated Population Indicates NFXL1 Variants Confer a Risk for Specific Language Impairment
Source: PubMed Central journal article supplement (PMC4363375; doi:10.1371/journal.pgen.1004925), 2015-03-17
Supplement: pgen.1004925.s003.pdf [file pgen.1004925.s003.pdf]

**Figure S3 - Linkage disequilibrium between markers across *NFXL1* region.**

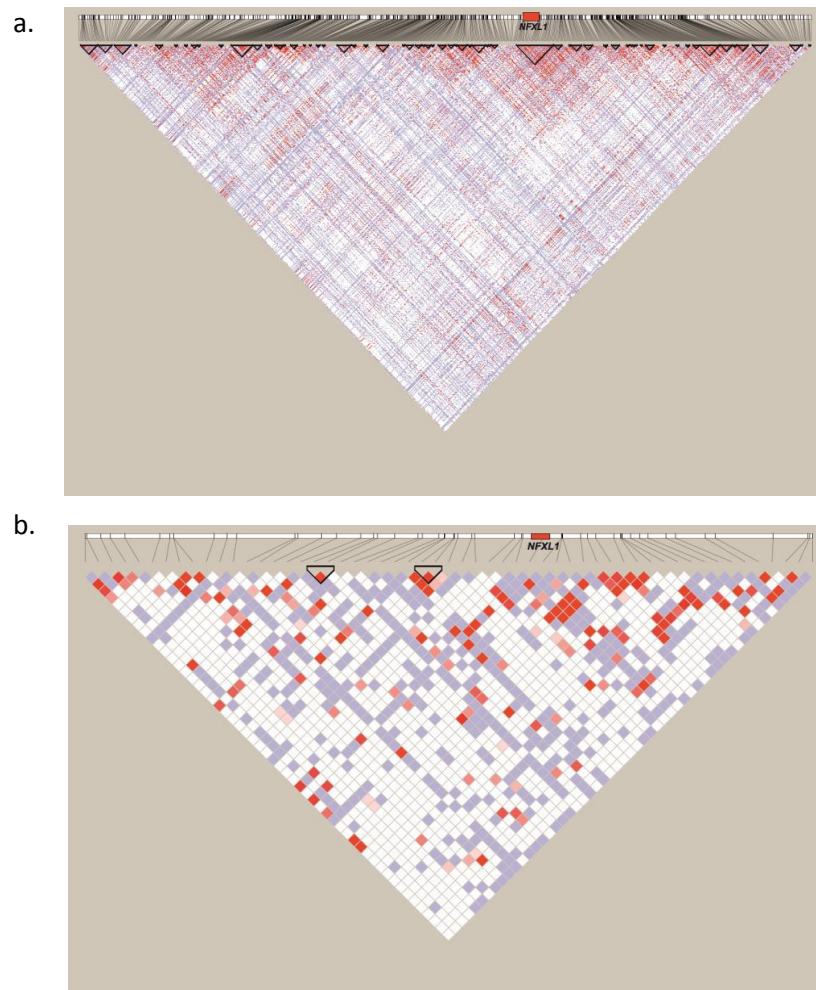

**a** - Linkage disequilibrium between all genotyped markers (n=929) across chr4:46-49Mb (hg19)

**b** - Linkage disequilibrium between all analyzed markers (n=55) across chr4:46-49Mb (hg19), after pruning for  $r^2 > 0.5$

Position of *NFXL1* gene is shown by red box. Plots were generated in haploview

(<http://www.broadinstitute.org/scientific-community/science/programs/medical-and-population-genetics/haploview/haploview>) using linkage pedigrees (as shown in Figure S2).

Color scheme is standard haploview colour scheme (blue –  $D' = 1$ , LOD < 2; white -  $D' < 1$ , LOD < 2; pink/red – LOD  $\geq 2$ ).
