# Supplementary material for: Exome Sequencing in an Admixed Isolated Population Indicates NFXL1 Variants Confer a Risk for Specific Language Impairment
Source: PubMed Central journal article supplement (PMC4363375; doi:10.1371/journal.pgen.1004925), 2015-03-17
Supplement: pgen.1004925.s004.pdf [file pgen.1004925.s004.pdf]

Figure S4 – Linkage across the *NFXL1* region

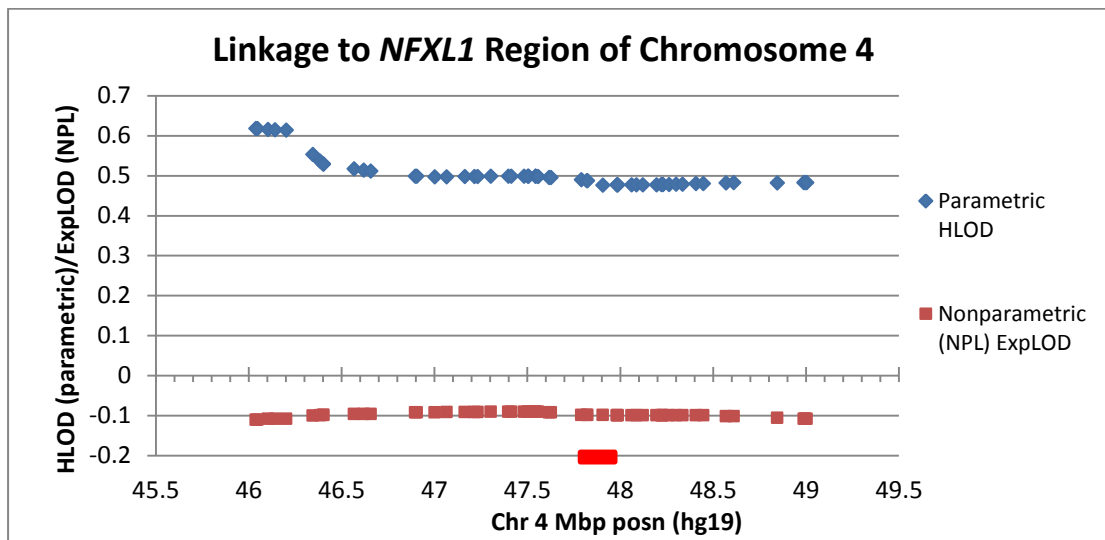

No linkage was observed to the *NFXL1* region of chromosome 4 under parametric and non-parametric models using a dense SNP array. The approximate position of the *NFXL1* gene is indicated by the red box on the X axis.
