# Supplementary material for: Exome Sequencing in an Admixed Isolated Population Indicates NFXL1 Variants Confer a Risk for Specific Language Impairment
Source: PubMed Central journal article supplement (PMC4363375; doi:10.1371/journal.pgen.1004925), 2015-03-17
Supplement: pgen.1004925.s005.pdf [file pgen.1004925.s005.pdf]

**Table S1 – Exome sequencing metrics**

|                                     | <b>SLI3</b> | <b>SLI8</b> | <b>SLI9</b> | <b>SLI12</b> | <b>SLI15</b> | <b>Average across 5 sequence samples</b> | <b>All sequence samples combined</b> |
|-------------------------------------|-------------|-------------|-------------|--------------|--------------|------------------------------------------|--------------------------------------|
| Min depth                           | 2           | 2           | 1           | 2            | 2            | 2                                        | 1                                    |
| Max depth                           | 2,142       | 1,234       | 2,843       | 1,602        | 3,721        | 2,308                                    | 3,721                                |
| Average depth                       | 12          | 24          | 39          | 19           | 35           | 26                                       | 34                                   |
| Median depth                        | 9           | 21          | 22          | 18           | 20           | 18                                       | 17                                   |
| % variants with $\geq 5x$ coverage  | 63.7%       | 87.3%       | 88.3%       | 85.2%        | 88.4%        | 82.6%                                    | 82.2%                                |
| % variants with $\geq 10x$ coverage | 47.5%       | 71.9%       | 73.8%       | 68.7%        | 72.3%        | 66.8%                                    | 66.5%                                |
| % variants with $\geq 20x$ coverage | 29.6%       | 52.5%       | 53.9%       | 47.4%        | 50.6%        | 46.8%                                    | 46.6%                                |
| Variants called                     | 63,031      | 59,822      | 58,769      | 52,881       | 57,972       | 58,495                                   | 145,369                              |
| Variants that map to genes          | 43,930      | 50,112      | 49,543      | 43,075       | 49,721       | 47,276                                   | 111,491                              |
| Variants in exons                   | 15,200      | 19,837      | 17,326      | 16,419       | 18,242       | 17,405                                   | 38,773                               |
| Variants in splice sites            | 2,645       | 3,304       | 3,143       | 2,879        | 3,042        | 3,003                                    | 6,516                                |
| Nonsense variants                   | 75          | 137         | 72          | 90           | 157          | 106                                      | 301                                  |
| Missense variants                   | 7,258       | 9,629       | 8,089       | 7,805        | 9,114        | 8,379                                    | 19,548                               |
| Deletions                           | 766         | 1,266       | 1,478       | 989          | 1,183        | 1,136                                    | 2,942                                |
| Insertions                          | 471         | 798         | 912         | 648          | 734          | 713                                      | 1,567                                |
