# Supplementary material for: Exome Sequencing in an Admixed Isolated Population Indicates NFXL1 Variants Confer a Risk for Specific Language Impairment
Source: PubMed Central journal article supplement (PMC4363375; doi:10.1371/journal.pgen.1004925), 2015-03-17
Supplement: pgen.1004925.s006.pdf [file pgen.1004925.s006.pdf]

**Table S2 - Regions of suggestive linkage in the Robinson Crusoe population (as presented in [35]).**

| Linkagepeak (hg19)        | Linkagepeak (hg18)        | Start SNP  | End SNP    | Start bp (hg19) | End bp (hg19) | max NPL score (p-value)        | SNP (chr posn, hg19) of max CEPH NPL score    |
|---------------------------|---------------------------|------------|------------|-----------------|---------------|--------------------------------|-----------------------------------------------|
| chr2:8038605-9916389      | chr2:7956056-9833840      | rs1364054  | rs12995394 | 8,038,605       | 9,916,389     | 3.9 (5.0x10 <sup>-5</sup> )    | rs3102960 (8312367)                           |
| chr6:8525127-10528561     | chr6:8470126-10636547     | rs1410766  | rs560194   | 8,525,127       | 10,528,561    | 3.96 (4.0x10 <sup>-5</sup> )   | rs761116 (9458096)                            |
| chr6:159048542-162847872  | chr6:158968530-162767862  | rs182429   | rs1333962  | 159,048,542     | 162,847,872   | 7.56 (3.2x10 <sup>-14</sup> )  | rs927450 (159761064) -rs675162 (160355293)    |
| chr7:112475603-159225515  | chr7:112262839-158821424  | rs7817     | rs455030   | 112,475,603     | 159,225,515   | 6.73 (4.0x10 <sup>-11</sup> )  | rs1524341 (147009597) - rs1024676 (147018769) |
| chr8:70571274-72653781    | chr8:70733828-72816335    | rs268564   | rs1440369  | 70,571,274      | 72,653,781    | 3.95 (4.0x10 <sup>-5</sup> )   | rs268564 (70571274)                           |
| chr8:139553440-144841669  | chr8:139622622-144913657  | rs741465   | rs1735169  | 139,553,440     | 144,841,669   | 3.69 (0.0001)                  | rs1375062 (140955682) - rs768803 (142124264)  |
| chr9:602986-21732913      | chr9:592986-21722913      | rs1532310  | rs1414237  | 602,986         | 21,732,913    | 3.72 (0.0001)                  | rs717081 (20287141)                           |
| chr12:132922352-133201580 | chr12:131432425-131711653 | rs1278602  | rs7960480  | 132,922,352     | 133,201,580   | 6.14 ((9.9x10 <sup>-10</sup> ) | rs595241 (133077993) - rs632610 (133084132)   |
| chr13:34588741-40958916   | chr13:33486741-39856916   | rs12429306 | rs7799     | 34,588,741      | 40,958,916    | 4.78 (8.0x10 <sup>-7</sup> )   | rs980285 (38465795)                           |
| chr13:83943347-94082682   | chr13:82841348-92880683   | rs1334857  | rs719223   | 83,943,347      | 94,082,682    | 3.49 (0.0002)                  | rs996297 (85433362) - rs979969 (87644846)     |
| chr17:80188016-82928872   | chr17:75776410-78480037   | rs3829611  | rs3785513  | 80,188,016      | 82,928,872    | 4.49 (3.0x10 <sup>-6</sup> )   | rs1046875 (82727550) - rs1046896 (82727657)   |
