# Supplementary material for: Exome Sequencing in an Admixed Isolated Population Indicates NFXL1 Variants Confer a Risk for Specific Language Impairment
Source: PubMed Central journal article supplement (PMC4363375; doi:10.1371/journal.pgen.1004925), 2015-03-17
Supplement: pgen.1004925.s007.pdf [file pgen.1004925.s007.pdf]

Table S3 - All variants found under the peaks of previous linkage (as reported in [35]) that were shared across all 5 exome samples.

| Position (hg19)          | Ref | Variant | Variation Type | SNP id     | Variant freq (dbSNP138) | Gene name | Gene id      | Gene component | AminoAcid changes | mRNA changes | phyloP | SIFT score | Grantham Score | Notes                                 |
|--------------------------|-----|---------|----------------|------------|-------------------------|-----------|--------------|----------------|-------------------|--------------|--------|------------|----------------|---------------------------------------|
| chr2:9419411-9419411     | G   | A       | substitution   | rs10193043 | 0.706284                | ASAP2     | NM_001135191 | INTRON_REGION  |                   |              | -1.23  |            |                | known common (>5%) SNP, intronic      |
| chr6:10214600-10214600   | G   | A       | substitution   | rs9366321  | 0.849656                |           |              |                |                   |              | -0.38  |            |                | known common (>5%) SNP, non-genic     |
| chr6:160198395-160198395 | G   | A       | substitution   | rs3465     | 0.281313                | ACAT2     | NM_005891    | EXON_REGION    | none              | 819G>A       | 0.40   |            |                | known common (>5%) SNP, nonsynonymous |
| chr6:160202167-160202167 | G   | A       | substitution   | rs2295899  | 0.418335                | TCP1      | NM_001008897 | INTRON_REGION  |                   |              | -0.39  |            |                | known common (>5%) SNP, intronic      |
| chr6:160211636-160211636 | G   | A       | substitution   | rs1128670  | 0.543881                | MRPL18    | NM_014161    | EXON_REGION    | R6Q               | 17G>A        | 3.46   | 0.34       | 43             | known common (>5%) SNP                |
| chr6:160234625-160234625 | G   | C       | substitution   | rs13220869 | 0.59001                 | PNLDC1    | NM_173516    | SA_SITE        |                   |              | -2.30  |            |                | known common (>5%) SNP                |
| chr6:160505199-160505199 | C   | G       | substitution   | rs614754   | 0.978161                | IGF2R     | NM_000876    | EXON_REGION    | none              | 6051C>G      | -0.64  |            |                | known common (>5%) SNP, nonsynonymous |
| chr6:160551204-160551204 | G   | C       | substitution   | rs683369   | 0.856156                | SLC22A1   | NM_153187    | EXON_REGION    | L160F             | 480G>C       | -0.44  | 0.34       | 22             | known common (>5%) SNP                |
| chr6:160677614-160677614 | G   | C       | substitution   | rs2774230  | 0.254709                | SLC22A2   | NM_003058    | INTRON_REGION  |                   |              | -0.93  |            |                | known common (>5%) SNP, intronic      |
| chr6:160888084-160888084 |     | A       | insertion      | rs71033580 | 1                       | LPAL2     | NR_028093    | UTR            |                   |              | -4.23  |            |                | known common (>5%) SNP, UTR           |
| chr6:161139502-161139502 | G   | A       | substitution   | rs2295368  | 0.371684                | PLG       | NM_000301    | INTRON_REGION  |                   |              | -1.27  |            |                | known common (>5%) SNP, intronic      |
| chr6:161469774-161469774 | G   | A       | substitution   | rs4559074  | 0.974063                | MAP3K4    | NM_006724    | EXON_REGION    | R157H             | 470G>A       | 2.57   | 0.27       | 29             | known common (>5%) SNP                |
| chr6:161531006-161531006 | G   | C       | substitution   | rs4709493  | 0.930402                | MAP3K4    | NM_005922    | INTRON_REGION  |                   |              | 0.35   |            |                | known common (>5%) SNP, intronic      |
| chr7:113518502-113518502 | A   | T       | substitution   | rs2974938  | 0.96805                 | PPP1R3A   | NM_002711    | EXON_REGION    | L882H             | 2645A>T      | -1.04  | 0          | 99             | known common (>5%) SNP                |
| chr7:113519719-113519719 | A   | T       | substitution   | rs2974944  | 0.996537                | PPP1R3A   | NM_002711    | EXON_REGION    | N476K             | 1428A>T      | 0.42   | 0.91       | 94             | known common (>5%) SNP                |
| chr7:120428799-120428799 | C   | A       | substitution   | rs41623    | 0.19992                 | TSPAN12   | NM_012338    | EXON_REGION    | none              | 765C>A       | -0.66  |            |                | known common (>5%) SNP, nonsynonymous |
| chr7:120450658-120450658 | G   | A       | substitution   | rs7805733  | 0.829338                | TSPAN12   | NM_012338    | INTRON_REGION  |                   |              | 0.80   |            |                | known common (>5%) SNP, intronic      |
| chr7:120764477-120764477 | G   | C       | substitution   | rs1524498  | 0.43903                 | C7orf58   | NM_001105533 | EXON_REGION    | none              | 1011G>C      | 0.42   |            |                | known common (>5%) SNP, nonsynonymous |
| chr7:121059871-121059871 | G   | A       | substitution   | rs2707500  | 0.680917                |           |              |                |                   |              | 0.35   |            |                | known common (>5%) SNP, non-genic     |
| chr7:123269118-123269118 | G   | C       | substitution   | rs4731112  | 0.744237                | ASB15     | NM_080928    | EXON_REGION    | G357A             | 1070G>C      | 4.02   | 1          | 60             | known common (>5%) SNP                |
| chr7:124387092-124387092 | C   | G       | substitution   | rs3735270  | 0.410128                | GPR37     | NM_005302    | EXON_REGION    | none              | 1329C>G      | 0.44   |            |                | known common (>5%) SNP, nonsynonymous |
| chr7:131815343-131815343 | G   | A       | substitution   | rs10954361 | 0.736126                | PLXNA4    | NM_020911    | SA_SITE        |                   |              | 0.87   |            |                | known common (>5%) SNP                |
| chr7:134849280-134849280 | T   | A       | substitution   | rs292501   | 0.913054                | TMEM140   | NM_018295    | EXON_REGION    | F29L              | 87T>A        | 0.64   | 1          | 22             | known common (>5%) SNP                |
| chr7:134873355-134873355 | G   | A       | substitution   | rs292564   | 0.720347                | WDR91     | NM_014149    | INTRON_REGION  |                   |              | -1.86  |            |                | known common (>5%) SNP, intronic      |
| chr7:135304273-135304273 | G   | C       | substitution   | rs7810767  | 0.982239                | NUP205    | NM_015135    | EXON_REGION    | E1356Q            | 4066G>C      | 2.27   |            | 29             | known common (>5%) SNP                |
| chr7:138200117-138200117 | A   | T       | substitution   | rs3757381  | 0.763263                | TRIM24    | NM_003852    | INTRON_REGION  |                   |              | 0.33   |            |                | known common (>5%) SNP, intronic      |
| chr7:138418910-138418910 | G   | A       | substitution   | rs1026435  | 0.695556                | ATP6V0A4  | NM_130840    | EXON_REGION    | none              | 1662G>A      | -1.17  |            |                | known common (>5%) SNP                |
| chr7:140082363-140082363 | G   | A       | substitution   | rs6968618  | 0.756045                | SLC37A3   | NM_207113    | UTR            |                   |              | -1.65  |            |                | known common (>5%) SNP, UTR           |
| chr7:141478574-141478574 | G   | C       | substitution   | rs2234001  | 0.492189                | TAS2R4    | NM_016944    | EXON_REGION    | V96L              | 286G>C       | 1.01   | 1          | 32             | known common (>5%) SNP                |
| chr7:141478800-141478800 | G   | A       | substitution   | rs2234002  | 0.456955                | TAS2R4    | NM_016944    | EXON_REGION    | S171N             | 512G>A       | -1.96  | 1          | 46             | known common (>5%) SNP                |
| chr7:141537945-141537945 | T   | A       | substitution   | rs11766230 | 0.049587                | PRSS37    | NM_001008270 | INTRON_REGION  |                   |              | -0.51  |            |                | known SNP, intronic                   |
| chr7:141673345-141673345 | C   | G       | substitution   | rs713598   | 0.471632                | TAS2R38   | NM_176817    | EXON_REGION    | A49P              | 145C>G       | 2.05   | 1          | 27             | known common (>5%) SNP                |
| chr7:143512184-143512184 | G   | A       | substitution   | rs72503048 | 1                       | LOC154761 | NR_015421    | UTR            |                   |              | -0.50  |            |                | known common (>5%) SNP, UTR           |
| chr7:146997203-146997203 | T   | A       | substitution   | rs2692185  | 0.246649                | CNTNAP2   | NM_014141    | INTRON_REGION  |                   |              | 0.49   |            |                | known common (>5%) SNP, intronic      |
| chr7:147964091-147964091 | G   | A       | substitution   | rs3801976  | 0.787494                | CNTNAP2   | NM_014141    | INTRON_REGION  |                   |              | -2.08  |            |                | known common (>5%) SNP, intronic      |
| chr7:148106490-148106490 | G   | A       | substitution   | rs9648691  | 0.556152                | CNTNAP2   | NM_014141    | EXON_REGION    | none              | 3723G>A      | -0.46  |            |                | known common (>5%) SNP, nonsynonymous |
| chr7:148851213-148851213 | G   | A       | substitution   | rs917124   | 0.719752                | ZNF398    | NM_170686    | EXON_REGION    | none              | 201G>A       | -0.80  |            |                | known common (>5%) SNP, nonsynonymous |
| chr7:150731338-150731338 | G   | C       | substitution   | rs2303923  | 0.711312                | ABC8      | NM_007188    | INTRON_REGION  |                   |              | -0.73  |            |                | known common (>5%) SNP, intronic      |
| chr7:150773072-150773072 | G   | C       | substitution   | rs2303939  | 0.591346                | SLC4A2    | NM_003040    | INTRON_REGION  |                   |              | -1.50  |            |                | known common (>5%) SNP, intronic      |
| chr7:151932819-151932819 | T   | A       | substitution   | rs80348298 | 0.5                     | MLL3      | NM_170606    | INTRON_REGION  |                   |              | 1.39   |            |                | known common (>5%) SNP, intronic      |
| chr7:151932824-151932824 | A   | T       | substitution   | rs78860638 | 0.5                     | MLL3      | NM_170606    | INTRON_REGION  |                   |              | -0.48  |            |                | known common (>5%) SNP, intronic      |
| chr7:151932897-151932897 | C   | A       | substitution   | rs73728782 | 0.5                     | MLL3      | NM_170606    | SD_SITE        |                   |              | 4.96   |            |                | known common (>5%) SNP                |
| chr7:151945101-151945101 | G   | C       | substitution   | rs3896406  | 1                       | MLL3      | NM_170606    | EXON_REGION    | none              | 2418G>C      | -0.84  |            |                | known common (>5%) SNP, nonsynonymous |
| chr7:151962176-151962176 | T   | A       | substitution   | rs62478356 | 0                       | MLL3      | NM_170606    | EXON_REGION    | none              | 1131T>A      | 0.63   |            |                | known SNP, nonsynonymous              |
| chr7:154862621-154862621 | T   | A       | substitution   | rs6320     | 0.273557                | HTR5A     | NM_024012    | EXON_REGION    | none              | 12T>A        | -0.81  |            |                | known common (>5%) SNP, nonsynonymous |
| chr7:157370688-157370688 | C   | G       | substitution   | rs122004   | 0.075527                | PTPRN2    | NM_130842    | INTRON_REGION  |                   |              | -1.42  |            |                | known common (>5%) SNP, intronic      |
| chr7:158438186-158438186 | G   | A       | substitution   | rs2290393  | 0.503484                | NCAPG2    | NM_017760    | INTRON_REGION  |                   |              | 0.28   |            |                | known common (>5%) SNP, intronic      |
| chr7:158455089-158455089 | G   | A       | substitution   | rs4484634  | 0.933361                | NCAPG2    | NM_017760    | INTRON_REGION  |                   |              | 0.31   |            |                | known common (>5%) SNP, intronic      |
| chr8:139614436-139614436 | G   | A       | substitution   | rs4394401  | 0.875817                | COL22A1   | NM_152888    | INTRON_REGION  |                   |              | -1.48  |            |                | known common (>5%) SNP, intronic      |
| chr8:139626176-139626176 | C   | G       | substitution   | rs7000261  | 0.123675                | COL22A1   | NM_152888    | SA_SITE        |                   |              | 0.99   |            |                | known common (>5%) SNP                |
| chr8:141034189-141034189 | A   | T       | substitution   | rs9792174  | 0.393066                | TRAPPC9   | NM_001160372 | SA_SITE        |                   |              | 0.59   |            |                | known common (>5%) SNP                |
| chr8:141559358-141559358 | G   | A       | substitution   | rs2292781  | 0.4134                  | EIF2C2    | NM_001164623 | EXON_REGION    | none              | 1443G>A      | -6.26  |            |                | known common (>5%) SNP, nonsynonymous |
| chr8:141568622-141568622 | G   | A       | substitution   | rs2292778  | 0.628608                | EIF2C2    | NM_001164623 | EXON_REGION    | none              | 840G>A       | -1.75  |            |                | known common (>5%) SNP, nonsynonymous |
| chr8:142204326-142204326 | C   | G       | substitution   | rs1045248  | 0.550396                | DENND3    | NM_014957    | EXON_REGION    | none              | 3591C>G      | -1.15  |            |                | known common (>5%) SNP, nonsynonymous |
| chr8:142228909-142228909 | G   | A       | substitution   | rs753778   | 0.342997                | SLC45A4   | NM_001080431 | EXON_REGION    | P226L             | 677G>A       | 0.52   | 0          | 98             | known common (>5%) SNP                |
| chr8:144406881-144406881 | G   | A       | substitution   | rs12680498 | 0.452011                | TOP1MT    | NM_052963    | INTRON_REGION  |                   |              | -2.95  |            |                | known common (>5%) SNP, intronic      |
| chr8:144801681-144801681 | G   | A       | substitution   | rs11778657 | 0.567132                | MAPK15    | NM_139021    | INTRON_REGION  |                   |              | -0.69  |            |                | known common (>5%) SNP, intronic      |

| Position (hg19)          | Ref | Variant | Variation Type | SNP id     | Variant freq (dbSNP138) | Gene name | Gene id      | Gene component | AminoAcid changes | mRNA changes | phyloP | SIFT score | Grantham Score | Notes                                                         |
|--------------------------|-----|---------|----------------|------------|-------------------------|-----------|--------------|----------------|-------------------|--------------|--------|------------|----------------|---------------------------------------------------------------|
| chr8:144808747-144808747 | G   | A       | substitution   | rs11136321 | 0.606372                | FAM83H    | NM_198488    | EXON_REGION    | none              | 2884G>A      | 1.12   |            |                | known common (>5%) SNP, nonsynonymous                         |
| chr8:144811338-144811338 | C   | G       | substitution   | rs9969600  | 0.000284                | FAM83H    | NM_198488    | EXON_REGION    | Q201H             | 603C>G       | 0.86   | 0.02       | 24             | known SNP, variant found in 98% of reads, SIFT low confidence |
| chr9:660290-660290       | G   | A       | substitution   | rs9407340  | 0.84253                 | KANK1     | NM_015158    | UTR            |                   |              | 0.79   |            |                | known common (>5%) SNP, UTR                                   |
| chr9:967981-967981       | G   | C       | substitution   | rs279895   | 0.090763                | DMRT1     | NM_021951    | SA_SITE        |                   |              | 0.97   |            |                | known common (>5%) SNP                                        |
| chr9:2170512-2170512     | G   | C       | substitution   | rs3793511  | 0.44369                 | SMARCA2   | NM_139045    | INTRON_REGION  |                   |              | 3.13   |            |                | known common (>5%) SNP, intronic                              |
| chr9:4722685-4722685     | C   | G       | substitution   | rs10758645 | 0.478291                | AK3       | NM_016282    | INTRON_REGION  |                   |              | -0.95  |            |                | known common (>5%) SNP, intronic                              |
| chr9:5081780-5081780     | G   | A       | substitution   | rs2230724  | 0.613773                | JAK2      | NM_004972    | EXON_REGION    | none              | 2490G>A      | -0.88  |            |                | known common (>5%) SNP, nonsynonymous                         |
| chr9:12973305-12973305   | C   | G       | substitution   | rs1887883  | 0.00535                 |           |              |                |                   |              | 1.64   |            |                | known SNP, non-genic                                          |
| chr9:14921722-14921722   | T   | A       | substitution   | rs2030594  | 0.293915                |           |              |                |                   |              | 0.61   |            |                | known common (>5%) SNP, non-genic                             |
| chr9:15055607-15055607   | G   | A       | substitution   | rs4445325  | 0.408491                |           |              |                |                   |              | -0.58  |            |                | known common (>5%) SNP, non-genic                             |
| chr9:15055921-15055921   | C   | G       | substitution   | rs7022876  | 0.620155                |           |              |                |                   |              | -1.20  |            |                | known common (>5%) SNP, non-genic                             |
| chr9:15056034-15056034   | G   | C       | substitution   | rs4740598  | 0.757162                |           |              |                |                   |              | -0.35  |            |                | known common (>5%) SNP, non-genic                             |
| chr9:15527569-15527569   | G   | A       | substitution   | rs28709032 | 0.542086                |           |              |                |                   |              | 0.73   |            |                | known common (>5%) SNP, non-genic                             |
| chr9:17409366-17409366   | G   | A       | substitution   | rs2780211  | 0.859498                | CNTLN     | NM_017738    | EXON_REGION    | none              | 2691G>A      | 1.01   |            |                | known common (>5%) SNP, nonsynonymous                         |
| chr9:17464402-17464402   | G   | C       | substitution   | rs1442532  | 0.940407                | CNTLN     | NM_017738    | INTRON_REGION  |                   |              | -1.18  |            |                | known common (>5%) SNP, intronic                              |
| chr9:20866974-20866974   | C   | G       | substitution   | rs7875872  | 0                       | KIAA1797  | NM_017794    | EXON_REGION    | T718S             | 2153C>G      | 2.07   | 1          | 58             | known SNP, variant found in 100% of reads, change tolerated   |
| chr13:36747798-36747798  | C   | G       | substitution   | rs1410633  | 0.998765                | SOHLH2    | NM_017826    | INTRON_REGION  |                   |              | -2.89  |            |                | known common (>5%) SNP, intronic                              |
| chr13:37512624-37512624  | G   | A       | substitution   | rs497908   | 0.91153                 |           |              |                |                   |              | 1.63   |            |                | known common (>5%) SNP, non-genic                             |
| chr13:37580139-37580139  | G   | A       | substitution   | rs1127446  | 0.340664                | EXOSC8    | NM_181503    | EXON_REGION    | none              | 321G>A       | 2.96   |            |                | known common (>5%) SNP, nonsynonymous                         |
| chr13:37583831-37583831  | G   | A       | substitution   | rs9469     | 0.353545                | FAM48A    | NM_001014286 | EXON_REGION    | T773M             | 2318G>A      | 1.79   | 0.46       | 81             | known common (>5%) SNP                                        |
| chr13:37584838-37584838  | G   | A       | substitution   | rs7317750  | 0.83635                 | FAM48A    | NM_017569    | INTRON_REGION  |                   |              | 1.40   |            |                | known common (>5%) SNP, intronic                              |
| chr13:38924083-38924083  | A   | T       | substitution   | rs2231330  | 0.085373                | UFM1      | NM_016617    | INTRON_REGION  |                   |              | -1.27  |            |                | known common (>5%) SNP, intronic                              |
| chr13:90644770-90644770  | G   | A       | substitution   | rs7982868  | 0.947218                |           |              |                |                   |              | -2.33  |            |                | known common (>5%) SNP, non-genic                             |
| chr13:90883383-90883383  | C   | G       | substitution   | rs12857240 | 0.538742                |           |              |                |                   |              | -0.51  |            |                | known common (>5%) SNP, non-genic                             |
| chr17:79478019-79478019  | G   | A       | substitution   | rs1139405  | 0.755689                | ACTG1     | NM_001614    | EXON_REGION    | none              | 918G>A       | 1.71   |            |                | known common (>5%) SNP, nonsynonymous                         |
| chr17:80696542-80696542  | G   | A       | substitution   | rs2253132  | 1                       | FN3K      | NM_022158    | INTRON_REGION  |                   |              | 0.26   |            |                | known common (>5%) SNP, intronic                              |
| chr17:80708601-80708601  | C   | G       | substitution   | rs1056534  | 0.372796                | FN3K      | NM_022158    | EXON_REGION    | none              | 900C>G       | -0.82  |            |                | known common (>5%) SNP, nonsynonymous                         |
